# Supplementary material for: Blood-based cardiometabolic phenotypes in atrial fibrillation and their associated risk: EAST-AFNET 4 biomolecule study
Source: PubMed Central journal article supplement — Cardiovasc Res. 2024 Apr 13;120(8):855–68. doi: 10.1093/cvr/cvae067 (PMC11218688; doi:10.1093/cvr/cvae067), 2024-04-13
Supplement: cvae067_supplementary_data.pdf [file cvae067_supplementary_data.pdf]

## **Blood-based cardiometabolic phenotypes in atrial fibrillation and their associated risk: EAST-AFNET 4 biomolecule study.**

Larissa Fabritz<sup>1,2,3,4,5</sup>, Winnie Chua<sup>5</sup>, Victor R. Cardoso<sup>5</sup>, Christoph Al-Taie<sup>1,2,3</sup>, Katrin Borof<sup>1,2</sup>, Anna Suling<sup>6</sup>, Linda Krause<sup>6</sup>, Shinwan Kany<sup>1,3,7,8</sup>, Christina Magnussen<sup>1,3,9</sup>, Karl Wegscheider<sup>6</sup>, Guenter Breithardt<sup>10</sup>, Harry Crijns<sup>11</sup>, A. John Camm<sup>12</sup>, George Gkoutos<sup>5</sup>, Patrick T. Ellinor<sup>7,8</sup>, Andreas Goette<sup>13</sup>, Ulrich Schotten<sup>4,14</sup>, Ursula-Henrike Wienhues-Thelen<sup>15</sup>, Tanja Zeller<sup>1,2,3</sup>, Renate B. Schnabel<sup>1,2,3</sup>, Antonia Zapf<sup>6</sup>, Paulus Kirchhof<sup>1,2,4,5</sup>

<sup>1</sup>Department of Cardiology, University Heart and Vascular Center Hamburg, University Medical Center Hamburg Eppendorf, Hamburg, Germany

<sup>2</sup>University Center of Cardiovascular Science, University Heart and Vascular Center Hamburg, University Medical Center Hamburg Eppendorf, Hamburg, Germany

<sup>3</sup>German Center for Cardiovascular Research (DZHK), partner site Hamburg/Kiel/Lübeck, Germany

<sup>4</sup>AFNET, Münster, Germany

<sup>5</sup>Institute of Cardiovascular Sciences, University of Birmingham, United Kingdom

<sup>6</sup>Institute of Medical Biometry and Epidemiology, University Medical Center Hamburg Eppendorf, Hamburg, Germany

<sup>7</sup>Cardiovascular Disease Initiative, The Broad Institute of MIT and Harvard, Cambridge, MA, USA

<sup>8</sup>Cardiovascular Research Center, Massachusetts General Hospital, Boston, MA, USA

<sup>9</sup>Center for Population Health Innovation (POINT), University Heart and Vascular Center Hamburg, University Medical Center Hamburg-Eppendorf, Hamburg, Germany

<sup>10</sup>University Hospital Münster, Münster, Germany

<sup>11</sup>Department of Cardiology, University Hospital Maastricht, Maastricht, The Netherlands

<sup>12</sup>Clinical Sciences, St George's University, London, UK

<sup>13</sup>Vincenz-Krankenhaus Paderborn, Germany

<sup>14</sup>Department of Physiology, Maastricht University, Maastricht, The Netherlands

<sup>15</sup>Roche Diagnostics, Penzberg, Germany

Short title: Biomolecule-based patient clusters in atrial fibrillation

*Supplementary Table 1: comparison of clinical features in the derivation cohort (EAST-AFNET4) and validation cohort (BBC-AF atrial fibrillation sub-cohort)*

|                           | <b>Cohort</b>                    |                          | <b>p-value</b> |
|---------------------------|----------------------------------|--------------------------|----------------|
|                           | <b>EAST AFNET 4</b><br>n = 1,586 | <b>BBC AF</b><br>n = 748 |                |
| Median age (years (IQR))  | 71 (66, 76)                      | 73 (64, 80)              | <0.001         |
| Female sex (n (%))        | 713 (45%)                        | 288 (39%)                | 0.003          |
| Mean Body Mass Index (SD) | 29.4 (5.3)                       | 29.9 (6.7)               | 0.5            |
| Hypertension (n (%))      | 1,400 (88%)                      | 399 (53%)                | <0.001         |
| Diabetes mellitus (n (%)) | 396 (25%)                        | 181 (24%)                | 0.700          |
| Heart failure (n (%))     | 475 (30%)                        | 200 (27%)                | 0.110          |
| <b>AF pattern</b>         |                                  |                          |                |
| No history                | 0 (0%)                           | 47 (6.3%)                |                |
| First episode             | 560 (35%)                        | 46 (6.1%)                |                |
| Paroxysmal                | 590 (37%)                        | 337 (45%)                |                |
| Paroxysmal atrial flutter | 0 (0%)                           | 7 (0.9%)                 |                |
| Long-standing persistent  | 0 (0%)                           | 83 (11%)                 |                |
| Persistent                | 436 (27%)                        | 140 (19%)                |                |
| Permanent                 | 0 (0%)                           | 88 (12%)                 |                |

Supplementary Figure 1: PRISMA flow chart of the validation cohort, patients with atrial fibrillation enrolled into BBC-AF

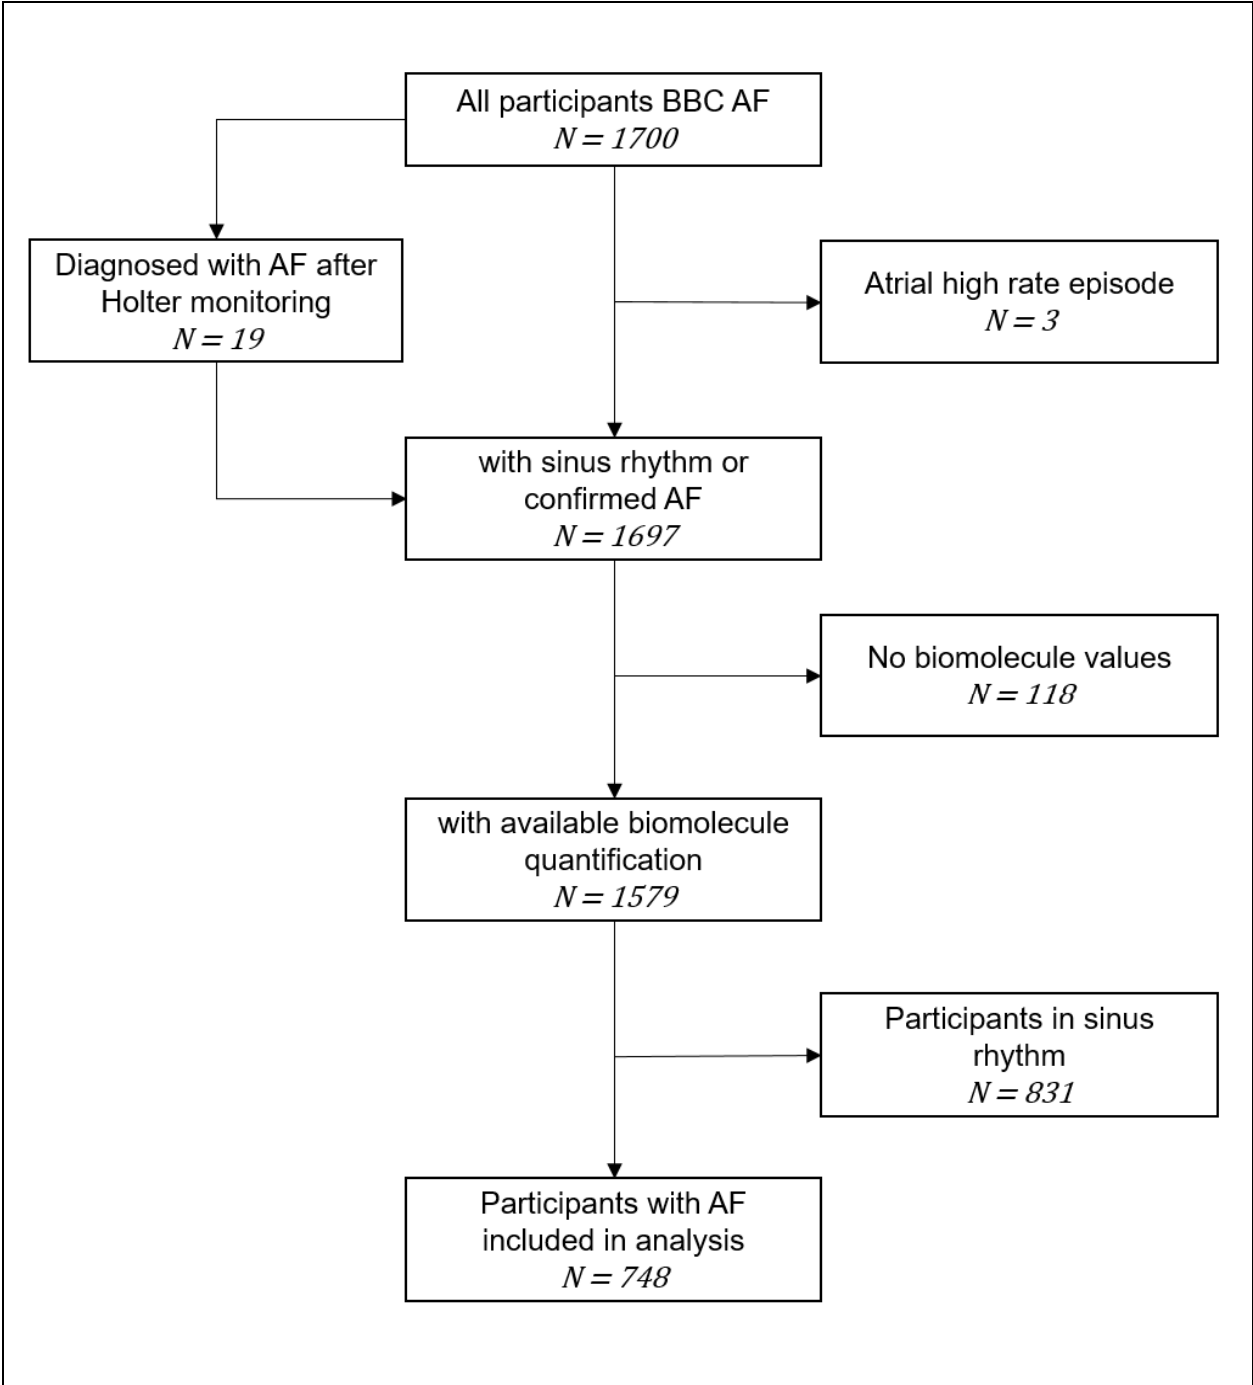

*Supplementary Table 2: Distribution of patients and clinical characteristics into the four biomolecule-based clusters in the validation cohort, BBC-AF.*

| Characteristic                              | Cluster in BBC AF                    |                                                |                                                 |                                       | p-value |
|---------------------------------------------|--------------------------------------|------------------------------------------------|-------------------------------------------------|---------------------------------------|---------|
|                                             | Low risk cluster<br>N = 268<br>(36%) | Low-intermediate risk cluster<br>N = 185 (25%) | High-intermediate risk cluster<br>N = 123 (16%) | High risk cluster<br>N = 172<br>(23%) |         |
| Age (years)                                 | 67 (58, 74)                          | 76 (68, 81)                                    | 74 (68, 80)                                     | 78 (70, 84)                           | <0.001  |
| Age ≥ 65 (years)                            | 157 (59%)                            | 153 (83%)                                      | 99 (80%)                                        | 150 (87%)                             | <0.001  |
| CHA <sub>2</sub> DS <sub>2</sub> VASc score | 3 (2, 4)                             | 4 (3, 5)                                       | 4 (3, 5)                                        | 4 (3, 5)                              | <0.001  |
| Gender                                      |                                      |                                                |                                                 |                                       | 0.070   |
| Female                                      | 90 (34%)                             | 81 (44%)                                       | 43 (35%)                                        | 74 (43%)                              |         |
| BMI                                         | 30 (26, 33)                          | 28 (25, 33)                                    | 28 (24, 33)                                     | 29 (25, 33)                           | 0.034   |
| Missing                                     | 9                                    | 10                                             | 8                                               | 9                                     |         |
| BMI ≥ 30                                    | 124 (48%)                            | 70 (40%)                                       | 45 (39%)                                        | 70 (43%)                              | 0.3     |
| Missing                                     | 9                                    | 10                                             | 8                                               | 9                                     |         |
| Arterial hypertension                       | 142 (53%)                            | 96 (52%)                                       | 70 (57%)                                        | 91 (53%)                              | 0.8     |
| Diabetes mellitus                           | 46 (17%)                             | 37 (20%)                                       | 36 (29%)                                        | 62 (36%)                              | <0.001  |
| Severe coronary artery disease              | 43 (16%)                             | 37 (20%)                                       | 44 (36%)                                        | 50 (29%)                              | <0.001  |
| Stable heart failure                        | 33 (12%)                             | 45 (24%)                                       | 36 (29%)                                        | 86 (50%)                              | <0.001  |
| Prior stroke or TIA                         | 10 (3.8%)                            | 11 (6.0%)                                      | 5 (4.1%)                                        | 13 (7.6%)                             | 0.3     |
| Missing                                     | 2                                    | 1                                              | 0                                               | 1                                     |         |
| LVEF < 50%                                  | 37 (15%)                             | 55 (33%)                                       | 51 (44%)                                        | 85 (51%)                              | <0.001  |
| Missing                                     | 21                                   | 16                                             | 7                                               | 5                                     |         |
| CAD                                         | 51 (19%)                             | 46 (25%)                                       | 51 (41%)                                        | 51 (30%)                              | <0.001  |
| Missing                                     | 2                                    | 3                                              | 0                                               | 2                                     |         |
| COPD                                        | 12 (4.5%)                            | 26 (14%)                                       | 20 (16%)                                        | 20 (12%)                              | <0.001  |
| Missing                                     | 2                                    | 1                                              | 1                                               | 1                                     |         |

*Supplementary Figure 2A: biomarker signature by poLCA cluster in EAST-AFNET 4. The heatmap illustrates distinct biomolecule patterns, e.g. intermediate concentrations for NT-proBNP and IGFBP7, but high concentrations of BMP10, in the intermediate-low risk cluster, or higher concentrations of IL-6 and CRP in the high-intermediate risk cluster. Low concentrations are coded in blue, high concentrations in red.*

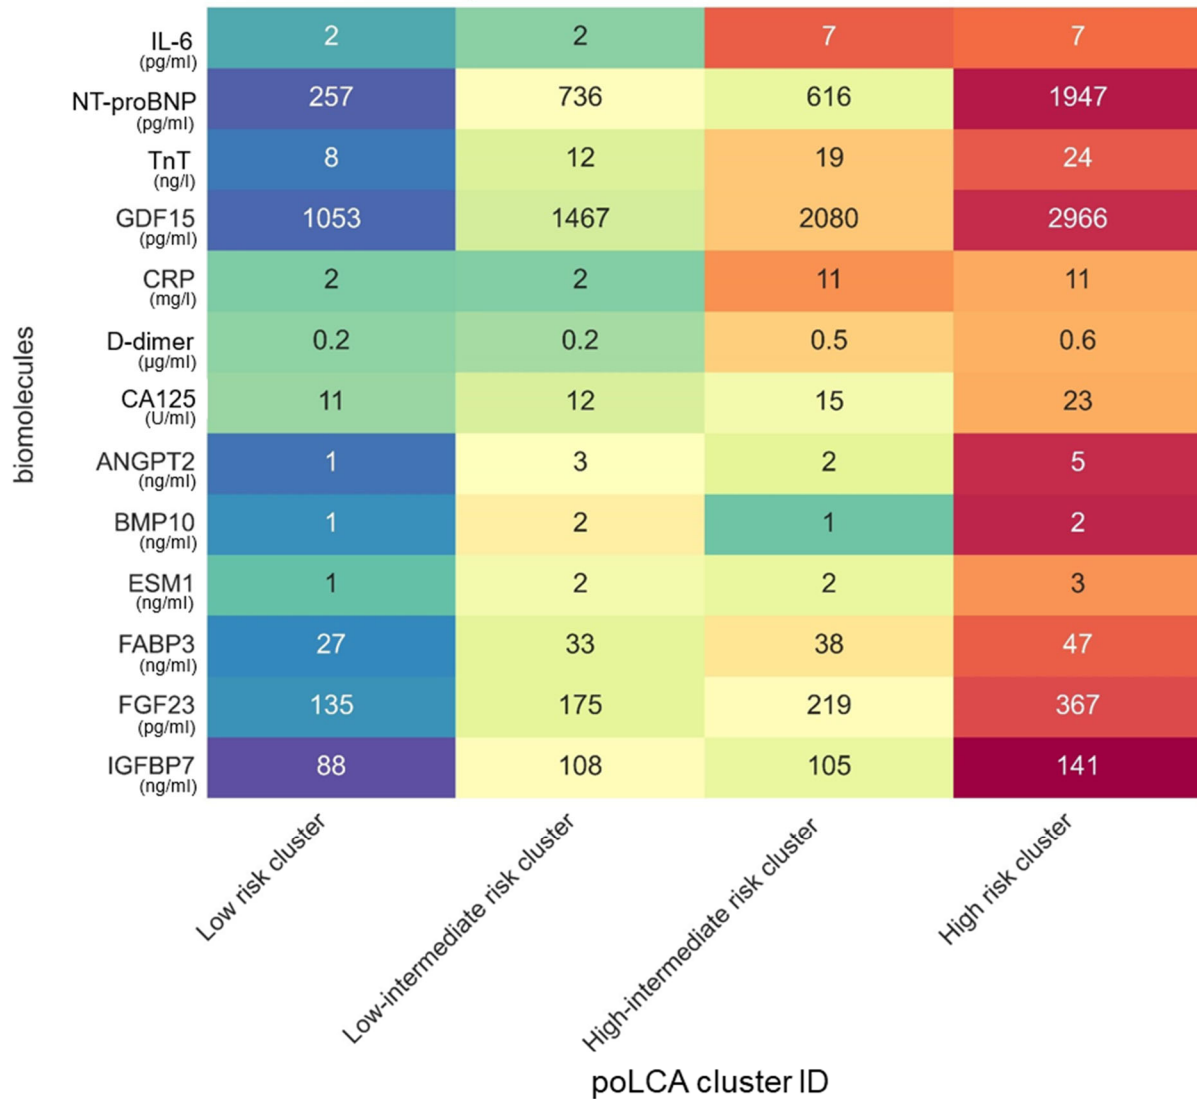

*Supplementary Figure 2B: mean biomarker signature by poLCA cluster in BBC AF. Distinct patterns that are comparable to the derivation cohort emerge, e.g. intermediate concentrations for NT-proBNP and IGFBP7, but high concentrations of BMP10, in the intermediate-low risk cluster, or higher concentrations of IL-6 and CRP in the high-intermediate risk cluster. Low concentrations are coded in blue, high concentrations in red.*

| biomolecules      | poLCA cluster ID |                               |                                |                   |
|-------------------|------------------|-------------------------------|--------------------------------|-------------------|
|                   | Low risk cluster | Low-intermediate risk cluster | High-intermediate risk cluster | High risk cluster |
| IL-6 (pg/ml)      | 5                | 5                             | 24                             | 25                |
| NT-proBNP (pg/ml) | 447              | 1642                          | 2731                           | 7864              |
| TnT (ng/l)        | 44               | 31                            | 485                            | 162               |
| GDF15 (pg/ml)     | 1309             | 2433                          | 3397                           | 6405              |
| CRP (mg/l)        | 6                | 5                             | 56                             | 47                |
| D-dimer (µg/ml)   | 0.3              | 0.4                           | 0                              | 1                 |
| CA125 (U/ml)      | 12               | 21                            | 43                             | 96                |
| ANGPT2 (ng/ml)    | 2                | 4                             | 4                              | 9                 |
| BMP10 (ng/ml)     | 1                | 2                             | 2                              | 3                 |
| ESM1 (ng/ml)      | 2                | 2                             | 2                              | 4                 |
| FABP3 (ng/ml)     | 29               | 39                            | 65                             | 91                |
| FGF23 (pg/ml)     | 203              | 323                           | 451                            | 1525              |
| IGFBP7 (ng/ml)    | 91               | 125                           | 118                            | 186               |

**Sensitivity Analysis I: Clustering using k-means**

Supplementary Table 3: crosstab comparing the partitioning of the EAST-AFNET 4 participants to cluster groups resulting from k-means and poLCA clustering. The adjusted rand index is 0.66133.

|                                       | poLCA cluster    |                               |                                |                   |             |
|---------------------------------------|------------------|-------------------------------|--------------------------------|-------------------|-------------|
|                                       | Low risk cluster | Low-intermediate risk cluster | High-intermediate risk cluster | High risk cluster | All         |
| <b>k-means cluster</b>                |                  |                               |                                |                   |             |
| <b>Low risk cluster</b>               | 444              | 21                            | 4                              | 0                 | <b>469</b>  |
| <b>Low-intermediate risk cluster</b>  | 34               | 406                           | 14                             | 13                | <b>467</b>  |
| <b>High-intermediate risk cluster</b> | 24               | 75                            | 263                            | 6                 | <b>368</b>  |
| <b>High risk cluster</b>              | 0                | 10                            | 21                             | 251               | <b>282</b>  |
| <b>All</b>                            | <b>502</b>       | <b>512</b>                    | <b>302</b>                     | <b>270</b>        | <b>1586</b> |

Supplementary Figure 3A: Aalen-Johansen curves for cluster groups from k-means clustering model for the first primary composite outcome in EAST-AFNET 4.

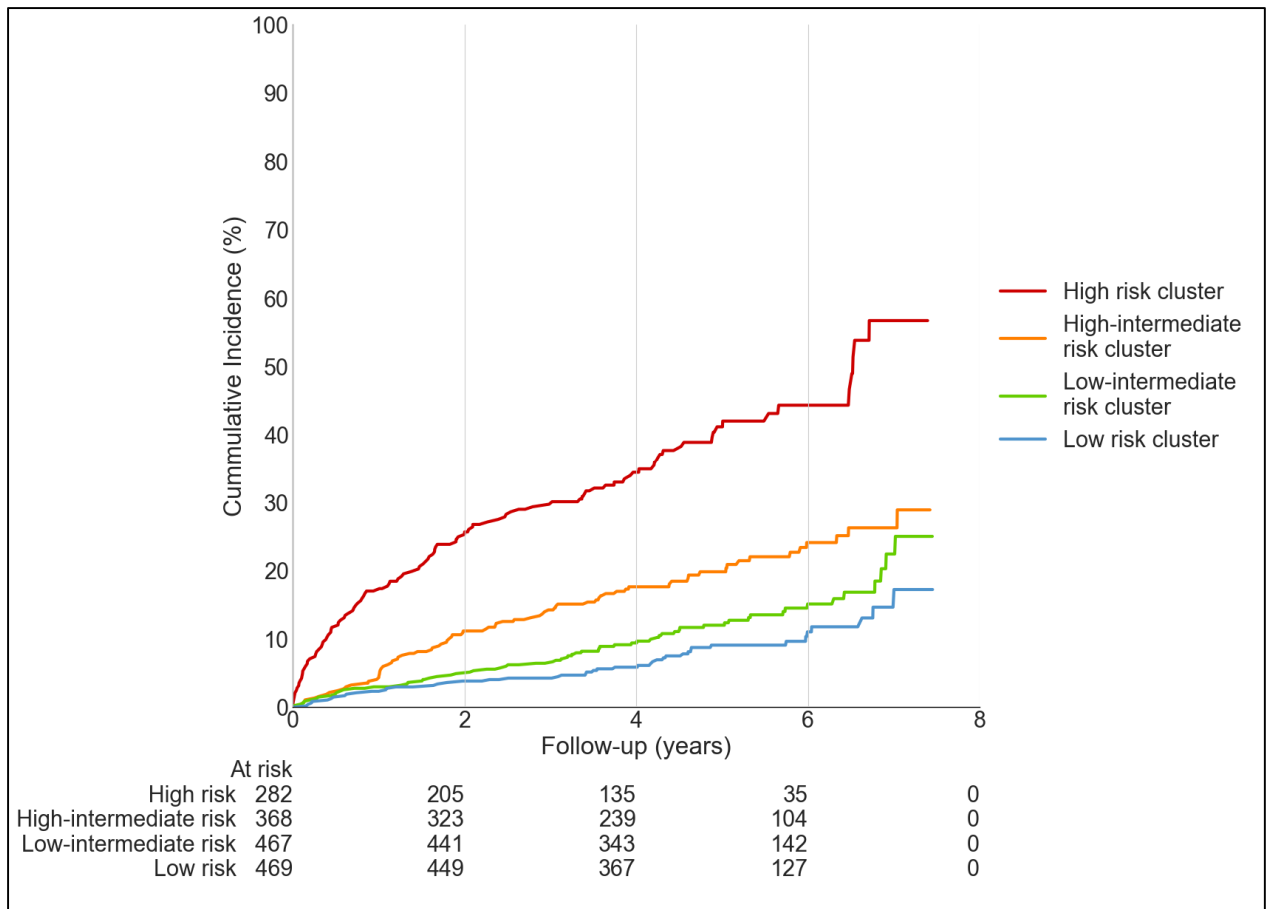

Supplementary Table 4a: efficacy HRs inclusive 95% CI for the first primary outcome in EASTAFNET 4 for cluster group by k-means; on the left from unadjusted Cox PH model, on the right additionally adjusted for age and sex.

| Predictors                            | HR (95% CI)        | p                 | HR (95% CI)        | p                 |
|---------------------------------------|--------------------|-------------------|--------------------|-------------------|
| <b>Low-intermediate risk cluster</b>  | 1.47 [1.11 – 1.94] | <b>0.007</b>      | 1.26 [0.95 – 1.68] | 0.109             |
| <b>High-intermediate risk cluster</b> | 2.39 [1.83 – 3.14] | <b>&lt; 0.001</b> | 1.98 [1.49 – 2.64] | <b>&lt; 0.001</b> |
| <b>High risk cluster</b>              | 5.78 [4.43 – 7.55] | <b>&lt; 0.001</b> | 4.64 [3.39 – 6.36] | <b>&lt; 0.001</b> |
| <b>age</b>                            |                    |                   | 1.03 [1.02 – 1.05] | <b>&lt; 0.001</b> |
| <b>male sex</b>                       |                    |                   | 1.33 [1.08 – 1.63] | <b>0.006</b>      |



Supplementary Figure 3B: Aalen-Johansen curves for cluster groups from k-means clustering model for the first primary safety outcome in EAST-AFNET 4.

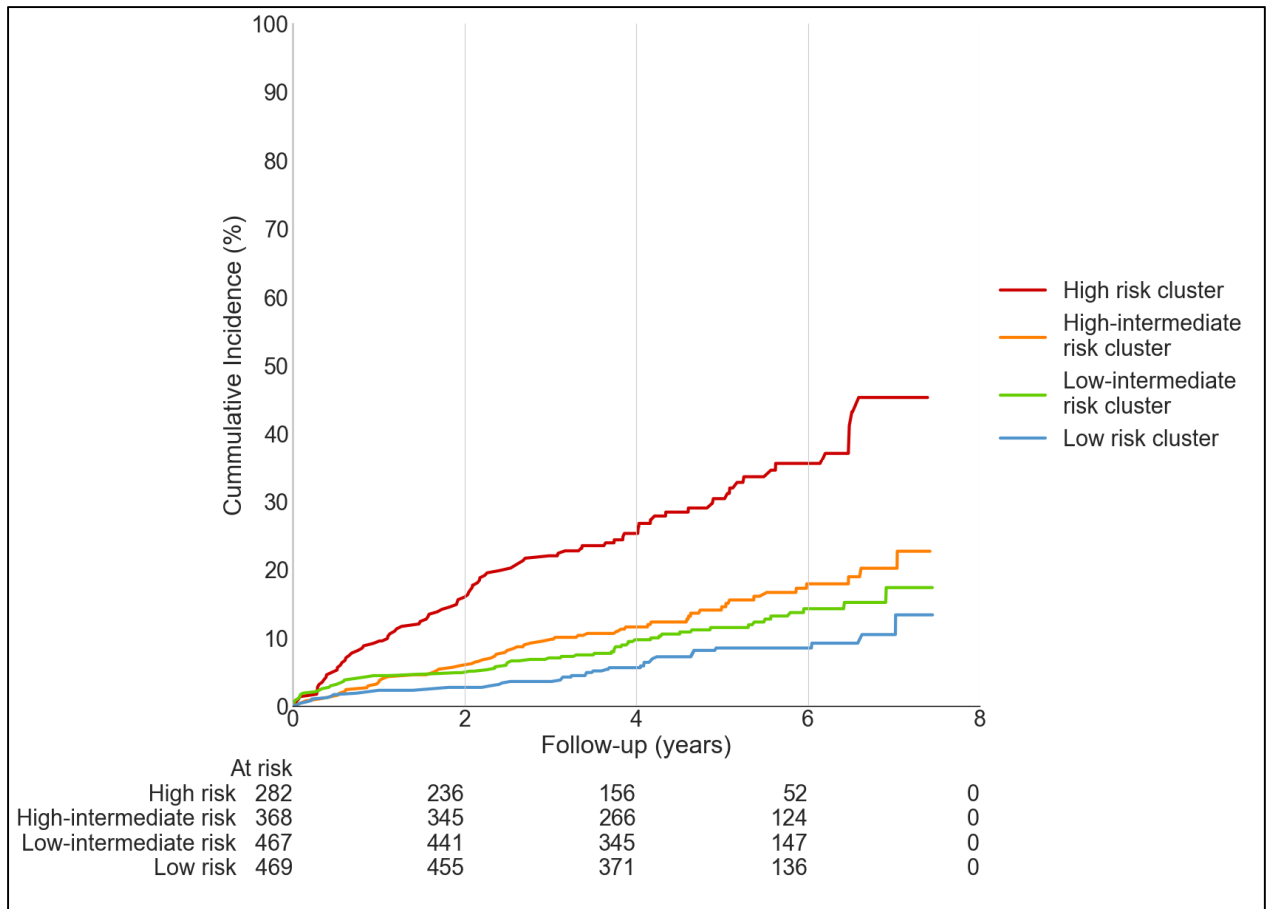

Supplementary Table 4b: safety HRs inclusive 95% CI for the first primary outcome in EAST-AFNET 4 for cluster group by k-means; on the left from unadjusted Cox PH model, on the right additionally adjusted for age and sex.

| Predictors                            | HR (95% CI)        | p                 | HR (95% CI)        | p                 |
|---------------------------------------|--------------------|-------------------|--------------------|-------------------|
| <b>Low-intermediate risk cluster</b>  | 1.53 [1.04 – 2.25] | <b>0.033</b>      | 1.24 [0.85 – 1.83] | 0.269             |
| <b>High-intermediate risk cluster</b> | 1.96 [1.29 – 2.97] | <b>0.002</b>      | 1.49 [1.02 – 2.19] | <b>0.041</b>      |
| <b>High risk cluster</b>              | 4.75 [3.46 – 6.53] | <b>&lt; 0.001</b> | 3.38 [2.43 – 4.70] | <b>&lt; 0.001</b> |
| <b>age</b>                            |                    |                   | 1.05 [1.03 – 1.07] | <b>&lt; 0.001</b> |
| <b>male sex</b>                       |                    |                   | 1.19 [0.93 – 1.52] | 0.166             |

*Supplementary Table 5: Early rhythm control, the randomized intervention, is effective in all four patient clusters in the EAST-AFNET 4 biomolecule study. Shown are event rates, Hazard ratios (HRs) and their 95% confidence interval (CI) for early rhythm control (ERC) and HRs for the cluster group for each cluster for the first primary outcome and its components stemming from unadjusted Cox models. Unsupervised poLCA model assigns patients to arbitrary cluster group IDs. Hazard ratios give the hazard reduction in patients randomized to early rhythm control with usual care in the low risk cluster set as the reference. All numbers give hazard ratios and their 95% confidence intervals in brackets.*

|                                                                  | <b>EAST - Cluster by poLCA</b>     |                                                           |                                                             |                                    |
|------------------------------------------------------------------|------------------------------------|-----------------------------------------------------------|-------------------------------------------------------------|------------------------------------|
|                                                                  | <b>Low risk<br/>(blue) cluster</b> | <b>Low-<br/>intermediate<br/>risk (green)<br/>cluster</b> | <b>High-<br/>intermediate<br/>risk (orange)<br/>cluster</b> | <b>High risk (red)<br/>cluster</b> |
| <b>First primary outcome</b>                                     | 52 (10%)                           | 69 (13%)                                                  | 76 (25%)                                                    | 104 (39%)                          |
| Early Rhythm Control                                             | 0.91 (0.53, 1.57)                  | 0.62 (0.38, 1.00)                                         | 0.59 (0.37, 0.95)                                           | 0.62 (0.42, 0.92)                  |
| Usual care                                                       | reference                          | 1.33 (0.93, 1.92)                                         | 2.70 (1.89, 3.85)                                           | 5.16 (3.68, 7.23)                  |
| <b>Death from cv causes</b>                                      | 10 (2.0%)                          | 17 (3.3%)                                                 | 21 (7.0%)                                                   | 42 (16%)                           |
| Early Rhythm Control                                             | 0.94 (0.27, 3.27)                  | 0.64 (0.24, 1.69)                                         | 0.85 (0.36, 2.03)                                           | 0.45 (0.23, 0.86)                  |
| Usual care                                                       | reference                          | 1.69 (0.77, 3.69)                                         | 3.78 (1.78, 8.02)                                           | 9.60 (4.81, 19.16)                 |
| <b>Stroke</b>                                                    | 10 (2.0%)                          | 16 (3.1%)                                                 | 11 (3.6%)                                                   | 14 (5.2%)                          |
| Early Rhythm Control                                             | 2.19 (0.57, 8.48)                  | 0.13 (0.03, 0.58)                                         | 0.94 (0.29, 3.08)                                           | 0.36 (0.11, 1.14)                  |
| Usual care                                                       | reference                          | 1.58 (0.72, 3.47)                                         | 1.96 (0.83, 4.62)                                           | 3.12 (1.38, 7.03)                  |
| <b>hospitalization due to<br/>worsening of heart<br/>failure</b> | 20 (4.0%)                          | 37 (7.2%)                                                 | 43 (14%)                                                    | 65 (24%)                           |
| Early Rhythm Control                                             | 0.75 (0.31, 1.81)                  | 1.12 (0.58, 2.13)                                         | 0.51 (0.27, 0.97)                                           | 0.67 (0.41, 1.10)                  |
| Usual care                                                       | reference                          | 1.84 (1.07, 3.17)                                         | 4.01 (2.36, 6.82)                                           | 8.07 (4.89, 13.34)                 |
| <b>hospitalization due to<br/>acute coronary<br/>syndrome</b>    | 17 (3.4%)                          | 14 (2.7%)                                                 | 18 (6.0%)                                                   | 14 (5.2%)                          |
| Early Rhythm Control                                             | 0.82 (0.32, 2.13)                  | 0.52 (0.17, 1.55)                                         | 0.41 (0.15, 1.16)                                           | 0.69 (0.24, 1.99)                  |
| Usual care                                                       | reference                          | 0.81 (0.40, 1.64)                                         | 1.89 (0.97, 3.66)                                           | 1.84 (0.90, 3.73)                  |

**Sensitivity Analysis I: Cox proportional hazard models using backward and forward selection of biomolecules.**

*Supplementary Figure 4: **A:** starting with all biomarkers from above to below one biomarker is subsequently subtracted from the Cox PH model leading to a change in AUC. **B:** starting with the null-model biomarkers are subsequently added to the model. Forward selection starts with TnT and backward selection never drops TnT. Also for ANGPT2 and IL-6 both model selection methods agree upon that those are important markers for discriminatory power of the models for the first primary composite outcome. Also both agree that IGFBP7 is least important in the linear model.*

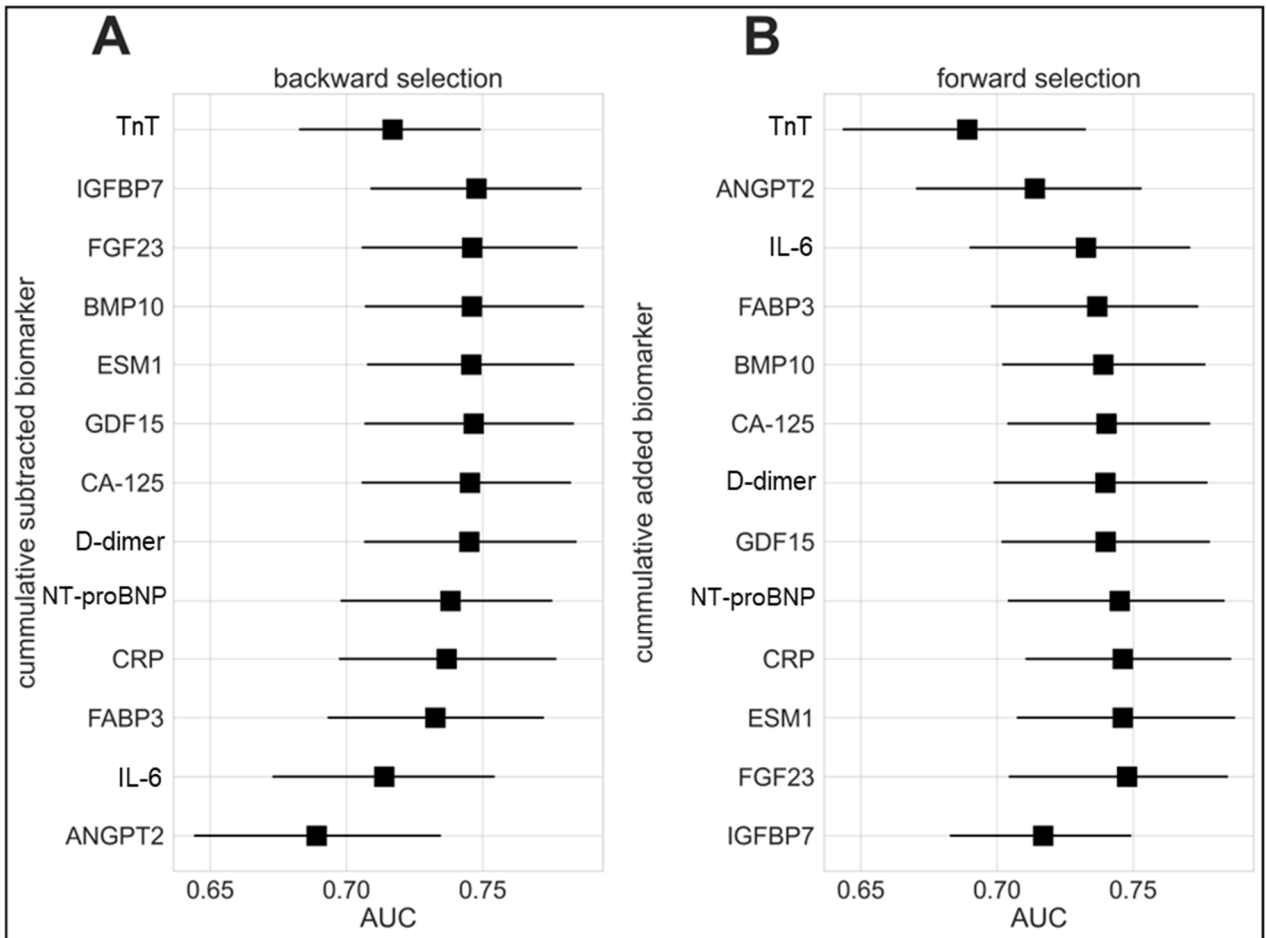

**Sensitivity Analysis II: Effect of removing/adding biomarkers directly in supervised Cox proportional hazard model (no prior clustering on biomarkers)**

*Supplementary Table 6a: different Cox proportional hazard model instances with different sets of biomarkers from **backward selection** for the first primary composite outcome in EAST-AFNET 4. AUC Area under the curve*

| <b>predictors</b>                                                                           | <b>AUC</b> | <b>AUC lower</b> | <b>AUC upper</b> |
|---------------------------------------------------------------------------------------------|------------|------------------|------------------|
| IL-6, NT-proBNP, TnT, GDF15, CRP, D-dimer, CA125, ANGPT2, BMP10, ESM1, FABP3, FGF23, IGFBP7 | 0.717      | 0.683            | 0.749            |
| IL-6, NT-proBNP, TnT, GDF15, CRP, D-dimer, CA125, ANGPT2, BMP10, ESM1, FABP3, FGF23         | 0.748      | 0.709            | 0.786            |
| IL-6, NT-proBNP, TnT, GDF15, CRP, D-dimer, CA125, ANGPT2, BMP10, ESM1, FABP3                | 0.746      | 0.706            | 0.785            |
| IL-6, NT-proBNP, TnT, GDF15, CRP, D-dimer, CA125, ANGPT2, ESM1, FABP3                       | 0.746      | 0.707            | 0.787            |
| IL-6, NT-proBNP, TnT, GDF15, CRP, D-dimer, CA125, ANGPT2, FABP3                             | 0.746      | 0.708            | 0.783            |
| IL-6, NT-proBNP, TnT, CRP, D-dimer, CA125, ANGPT2, FABP3                                    | 0.747      | 0.707            | 0.783            |
| IL-6, NT-proBNP, TnT, CRP, D-dimer, ANGPT2, FABP3                                           | 0.745      | 0.706            | 0.782            |
| IL-6, NT-proBNP, TnT, CRP, ANGPT2, FABP3                                                    | 0.745      | 0.707            | 0.784            |
| IL-6, TnT, CRP, ANGPT2, FABP3                                                               | 0.738      | 0.698            | 0.775            |
| IL-6, TnT, ANGPT2, FABP3                                                                    | 0.737      | 0.698            | 0.777            |
| IL-6, TnT, ANGPT2                                                                           | 0.733      | 0.693            | 0.772            |
| TnT, ANGPT2                                                                                 | 0.714      | 0.673            | 0.754            |
| TnT                                                                                         | 0.689      | 0.644            | 0.734            |

Supplementary Table 6b: different Cox proportional model instances with different sets of biomarkers from **forward selection** for the first primary composite outcome in EAST-AFNET 4. AUC Area under the curve

| <b>predictors</b>                                                                           | <b>AUC</b> | <b>AUC lower</b> | <b>AUC upper</b> |
|---------------------------------------------------------------------------------------------|------------|------------------|------------------|
| TnT                                                                                         | 0.689      | 0.644            | 0.732            |
| TnT, ANGPT2                                                                                 | 0.714      | 0.671            | 0.753            |
| IL-6, TnT, ANGPT2                                                                           | 0.733      | 0.690            | 0.771            |
| IL-6, TnT, ANGPT2, FABP3                                                                    | 0.737      | 0.698            | 0.774            |
| IL-6, TnT, ANGPT2, BMP10, FABP3                                                             | 0.739      | 0.702            | 0.776            |
| IL-6, TnT, CA125, ANGPT2, BMP10, FABP3                                                      | 0.740      | 0.704            | 0.778            |
| IL-6, TnT, D-dimer, CA125, ANGPT2, BMP10, FABP3                                             | 0.740      | 0.699            | 0.777            |
| IL-6, TnT, GDF15, D-dimer, CA125, ANGPT2, BMP10, FABP3                                      | 0.740      | 0.702            | 0.778            |
| IL-6, NT-proBNP, TnT, GDF15, D-dimer, CA125, ANGPT2, BMP10, FABP3                           | 0.745      | 0.704            | 0.783            |
| IL-6, NT-proBNP, TnT, GDF15, CRP, D-dimer, CA125, ANGPT2, BMP10, FABP3                      | 0.746      | 0.711            | 0.786            |
| IL-6, NT-proBNP, TnT, GDF15, CRP, D-dimer, CA125, ANGPT2, BMP10, ESM1, FABP3                | 0.746      | 0.708            | 0.787            |
| IL-6, NT-proBNP, TnT, GDF15, CRP, D-dimer, CA125, ANGPT2, BMP10, ESM1, FABP3, FGF23         | 0.748      | 0.705            | 0.785            |
| IL-6, NT-proBNP, TnT, GDF15, CRP, D-dimer, CA125, ANGPT2, BMP10, ESM1, FABP3, FGF23, IGFBP7 | 0.717      | 0.683            | 0.749            |

**Sensitivity Analysis III: Hazard ratios for patients groups defined by quartiles of individual biomolecules.**

Supplementary Table 7: Comparison of hazard ratios for the four biomolecule cluster groups and for quartiles of patients defined by concentrations of individual biomolecules. For this analysis, patients were grouped into four equal groups by biomolecule quartiles. Shown are hazard ratios and the 95% confidence intervals for the primary outcome. Hazard ratios for the biomolecules TnT and NT-proBNP are shown in Table 4 alongside other established risk estimators.

|                                                  | <b>Low risk (blue) cluster / lowest quartile</b> | <b>Low-intermediate risk (green) cluster / second-lowest quartile</b> | <b>High-intermediate risk (orange) cluster / second-highest quartile</b> | <b>High risk (red) cluster / highest quartile</b> |
|--------------------------------------------------|--------------------------------------------------|-----------------------------------------------------------------------|--------------------------------------------------------------------------|---------------------------------------------------|
| <b><i>EAST-AFNET 4 (derivation data set)</i></b> |                                                  |                                                                       |                                                                          |                                                   |
| Biomolecule clusters                             | 1 (reference)                                    | 1.3 [0.9, 1.9]                                                        | 2.7 [1.9, 3.6]                                                           | 5.2 [3.7, 7.2]                                    |
| IL-6                                             | 1 (reference)                                    | 1.5 [0.9 – 2.5]                                                       | 1.8 [1.2 – 2.7]                                                          | 3.7 [2.5 – 5.6]                                   |
| IGFBP7                                           | 1 (reference)                                    | 1.0 [0.7 – 1.4]                                                       | 1.3 [0.9 – 1.8]                                                          | 2.9 [2.2 – 3.8]                                   |
| CRP                                              | 1 (reference)                                    | 1.4 [0.9 – 2.1]                                                       | 1.4 [0.9 – 1.9]                                                          | 2.4 [1.7 – 3.3]                                   |
| GDF15                                            | 1 (reference)                                    | 1.8 [1.4 – 2.4]                                                       | 2.6 [1.9 – 3.6]                                                          | 4.2 [3.2 – 5.6]                                   |
| FGF23                                            | 1 (reference)                                    | 1.1 [0.8 – 1.5]                                                       | 1.7 [1.3 – 2.3]                                                          | 2.3 [1.7 – 3.2]                                   |
| FABP3                                            | 1 (reference)                                    | 1.1 [0.8 – 1.5]                                                       | 1.5 [1.0 – 2.2]                                                          | 2.8 [1.9 – 4.1]                                   |
| ESM1                                             | 1 (reference)                                    | 1.2 [0.9 – 1.6]                                                       | 1.1 [0.8 – 1.6]                                                          | 1.9 [1.5 – 2.7]                                   |
| D-dimer                                          | 1 (reference)                                    | 1.2 [0.8 – 1.9]                                                       | 2.3 [1.5 – 3.5]                                                          | 2.6 [1.7 – 3.9]                                   |
| CA125 (quartiles)                                | 1 (reference)                                    | 0.8 [0.5 – 1.0]                                                       | 0.8 [0.6 – 1.0]                                                          | 1.4 [1.0 – 1.9]                                   |
| BMP10                                            | 1 (reference)                                    | 1.3 [0.9 – 1.9]                                                       | 1.8 [1.3 – 2.5]                                                          | 1.9 [1.3 – 2.9]                                   |
| ANGPT2                                           | 1 (reference)                                    | 1.4 [0.9 – 2.2]                                                       | 2.1 [1.5 – 2.9]                                                          | 2.5 [1.9 – 3.3]                                   |
| Serum creatinine                                 | 1 (reference)                                    | 1.20 [0.85 -1.69]                                                     | 1.21 [0.85 – 1.73]                                                       | 1.85 [1.35 – 2.55]                                |
| <b><i>BBC-AF (validation data set)</i></b>       |                                                  |                                                                       |                                                                          |                                                   |
| Biomolecule clusters BBC-AF (validation)         | 1 (reference)                                    | 4.0 [2.3 – 7.0]                                                       | 8.3 [4.80 – 14.4]                                                        | 14.1 [8.4 – 23.7]                                 |
| IL-6                                             | 1 (reference)                                    | 2.4 [1.3 – 4.5]                                                       | 5.1 [2.8 – 9.1]                                                          | 8.4 [4.8 – 14.8]                                  |
| IGFBP7                                           | 1 (reference)                                    | 1.7 [1.0 – 3.0]                                                       | 2.7 [1.6 – 4.5]                                                          | 7.1 [4.3 – 11.4]                                  |
| CRP                                              | 1 (reference)                                    | 1.5 [0.9 – 2.5]                                                       | 2.4 [1.5 – 3.8]                                                          | 3.6 [2.3 – 5.6]                                   |
| GDF15                                            | 1 (reference)                                    | 1.8 [1.0 – 3.4]                                                       | 4.2 [2.4 – 7.3]                                                          | 10.6 [6.2 – 18.1]                                 |
| FGF23                                            | 1 (reference)                                    | 1.3 [0.8 – 2.2]                                                       | 2.2 [1.4 – 3.7]                                                          | 5.3 [3.4 – 8.4]                                   |
| FABP3                                            | 1 (reference)                                    | 1.8 [1.0 – 3.2]                                                       | 4.2 [2.5 – 7.0]                                                          | 7.3 [4.4 – 12.0]                                  |
| ESM1                                             | 1 (reference)                                    | 1.5 [1.0 – 2.4]                                                       | 1.8 [1.1 – 2.8]                                                          | 3.2 [2.1 – 5.0]                                   |
| D-dimer                                          | 1 (reference)                                    | 2.0 [1.2 – 3.4]                                                       | 3.1 [1.9 – 5.0]                                                          | 4.8 [3.0 – 7.7]                                   |
| CA125                                            | 1 (reference)                                    | 1.6 [1.0 – 2.8]                                                       | 2.1 [1.3 – 3.5]                                                          | 6.0 [3.8 – 9.4]                                   |
| BMP10                                            | 1 (reference)                                    | 2.5 [1.4 – 4.5]                                                       | 4.3 [2.5 – 7.4]                                                          | 8.0 [4.8 – 13.5]                                  |
| ANGPT2                                           | 1 (reference)                                    | 2.3 [1.3 – 4.2]                                                       | 5.1 [3.0 – 8.9]                                                          | 8.8 [5.1 – 15.0]                                  |
| Serum creatinine                                 | 1 (reference)                                    | 0.98 [0.61 -1.57]                                                     | 1.55 [1.00 – 2.40]                                                       | 2.76 [1.84 – 4.13]                                |

*Supplementary Table 8a: Shown is the unique, common and total explained variance for each variable for assignment of patients into the high risk cluster, measured by pseudo  $R^2$  in descending order of percentage variance explained for High risk cluster by poLCA in EAST-AFNET 4*

| <b>High risk cluster</b> | <b>Unique</b> | <b>Common</b> | <b>Total</b> |
|--------------------------|---------------|---------------|--------------|
| IGFBP7                   | 0.014         | 0.284         | 0.298        |
| NT-proBNP                | 0.009         | 0.249         | 0.258        |
| BMP10                    | 0.023         | 0.218         | 0.241        |
| GDF15                    | 0.007         | 0.221         | 0.228        |
| ANGPT2                   | 0.007         | 0.220         | 0.227        |
| FGF23                    | 0.006         | 0.178         | 0.184        |
| TnT                      | 0.002         | 0.156         | 0.157        |
| FABP3                    | 0.003         | 0.148         | 0.151        |
| IL-6                     | 0.001         | 0.138         | 0.138        |
| ESM1                     | 0.001         | 0.091         | 0.092        |
| CRP                      | 0.003         | 0.071         | 0.073        |
| CA125                    | 0.004         | 0.068         | 0.071        |
| D-dimer                  | 0.002         | 0.065         | 0.068        |

*Supplementary Table 8b: Shown is the unique, common and total explained variance for each variable for assignment of patients into the high-intermediate risk cluster, measured by pseudo  $R^2$  in descending order of percentage variance explained for high risk cluster by poLCA in EAST-AFNET 4*

| <b>High-intermediate risk cluster</b> | <b>Unique</b> | <b>Common</b> | <b>Total</b> |
|---------------------------------------|---------------|---------------|--------------|
| IL-6                                  | 0.059         | 0.124         | 0.183        |
| CRP                                   | 0.010         | 0.098         | 0.108        |
| TnT                                   | 0.010         | 0.046         | 0.056        |
| GDF15                                 | 0.010         | 0.047         | 0.056        |
| D-dimer                               | 0.006         | 0.041         | 0.047        |
| BMP10                                 | 0.027         | 0.014         | 0.041        |
| FABP3                                 | 0.000         | 0.026         | 0.027        |
| FGF23                                 | 0.000         | 0.009         | 0.009        |
| CA125                                 | 0.000         | 0.001         | 0.002        |
| ANGPT2                                | 0.003         | -0.003        | 0.000        |
| NT-proBNP                             | 0.002         | -0.002        | 0.000        |
| ESM1                                  | 0.000         | 0.000         | 0.000        |
| IGFBP7                                | 0.007         | -0.007        | 0.000        |

*Supplementary Table 8c: Shown is the unique, common and total explained variance for each variable for assignment of patients into the Low-intermediate high-risk cluster, measured by pseudo  $R^2$  in descending order of percentage variance explained for high risk cluster by poLCA in EAST-AFNET 4*

| <b>Low-intermediate risk cluster</b> | <b>Unique</b> | <b>Common</b> | <b>Total</b> |
|--------------------------------------|---------------|---------------|--------------|
| IL-6                                 | 0.033         | 0.035         | 0.068        |
| CRP                                  | 0.011         | 0.048         | 0.059        |
| BMP10                                | 0.005         | 0.033         | 0.038        |
| D-dimer                              | 0.013         | 0.016         | 0.029        |
| IGFBP7                               | 0.015         | 0.005         | 0.019        |
| NT-proBNP                            | 0.008         | 0.008         | 0.016        |
| ANGPT2                               | 0.006         | 0.007         | 0.013        |
| GDF15                                | 0.002         | 0.002         | 0.004        |
| ESM1                                 | 0.001         | 0.002         | 0.004        |
| CA125                                | 0.002         | 0.001         | 0.003        |
| TnT                                  | 0.000         | 0.002         | 0.002        |
| FABP3                                | 0.000         | 0.000         | 0.000        |
| FGF23                                | 0.000         | 0.000         | 0.000        |

*Supplementary Table 8d: Shown is the unique, common and total explained variance for each variable for assignment of patients into the low risk cluster, measured by pseudo  $R^2$  in descending order of percentage variance explained for High risk cluster by poLCA in EAST-AFNET 4*

| <b>Low risk cluster</b> | <b>Unique</b> | <b>Common</b> | <b>Total</b> |
|-------------------------|---------------|---------------|--------------|
| IGFBP7                  | 0.022         | 0.316         | 0.338        |
| NT-proBNP               | 0.017         | 0.274         | 0.291        |
| GDF15                   | 0.011         | 0.260         | 0.271        |
| ANGPT2                  | 0.009         | 0.230         | 0.239        |
| TnT                     | 0.010         | 0.217         | 0.227        |
| FABP3                   | 0.003         | 0.187         | 0.190        |
| BMP10                   | 0.003         | 0.175         | 0.178        |
| FGF23                   | 0.004         | 0.169         | 0.172        |
| IL-6                    | 0.002         | 0.157         | 0.159        |
| ESM1                    | 0.003         | 0.091         | 0.094        |
| CRP                     | 0.000         | 0.063         | 0.063        |
| D-dimer                 | 0.000         | 0.049         | 0.049        |
| CA125                   | 0.000         | 0.039         | 0.039        |



Supplementary Table 9a: four levels of dominance and resulting percentage relative importance for each biomolecule and poLCA high risk cluster.

| <b>High risk cluster</b> |                                |                             |                                  |                        |                                       |
|--------------------------|--------------------------------|-----------------------------|----------------------------------|------------------------|---------------------------------------|
|                          | <b>Interactional Dominance</b> | <b>Individual Dominance</b> | <b>Average Partial Dominance</b> | <b>Total Dominance</b> | <b>Percentage Relative Importance</b> |
| <b>NT-proBNP</b>         | 0.048                          | 0.322                       | 0.112                            | 0.123                  | 17.004                                |
| <b>IGFBP7</b>            | 0.045                          | 0.328                       | 0.110                            | 0.121                  | 16.799                                |
| <b>BMP10</b>             | 0.038                          | 0.295                       | 0.108                            | 0.117                  | 16.166                                |
| <b>ANGPT2</b>            | 0.034                          | 0.254                       | 0.084                            | 0.093                  | 12.874                                |
| <b>GDF15</b>             | 0.019                          | 0.194                       | 0.052                            | 0.061                  | 8.384                                 |
| <b>FGF23</b>             | 0.012                          | 0.170                       | 0.040                            | 0.048                  | 6.641                                 |
| <b>FABP3</b>             | 0.015                          | 0.144                       | 0.041                            | 0.047                  | 6.441                                 |
| <b>TnT</b>               | 0.005                          | 0.121                       | 0.025                            | 0.031                  | 4.295                                 |
| <b>ESM1</b>              | 0.006                          | 0.067                       | 0.019                            | 0.022                  | 2.999                                 |
| <b>CA 125</b>            | 0.001                          | 0.079                       | 0.013                            | 0.018                  | 2.436                                 |
| <b>CRP</b>               | 0.003                          | 0.061                       | 0.012                            | 0.015                  | 2.070                                 |
| <b>IL-6</b>              | 0.000                          | 0.084                       | 0.010                            | 0.015                  | 2.043                                 |
| <b>D-dimer</b>           | 0.007                          | 0.047                       | 0.011                            | 0.013                  | 1.847                                 |

Supplementary Table 9b: four levels of dominance and resulting percentage relative importance for each biomolecule and poLCA high-intermediate risk cluster.

| <b>High-intermediate risk cluster</b> |                                |                             |                                  |                        |                                       |
|---------------------------------------|--------------------------------|-----------------------------|----------------------------------|------------------------|---------------------------------------|
|                                       | <b>Interactional Dominance</b> | <b>Individual Dominance</b> | <b>Average Partial Dominance</b> | <b>Total Dominance</b> | <b>Percentage Relative Importance</b> |
| <b>BMP10</b>                          | 0.066                          | 0.073                       | 0.086                            | 0.083                  | 28.190                                |
| <b>IL-6</b>                           | 0.051                          | 0.100                       | 0.079                            | 0.078                  | 26.356                                |
| <b>CRP</b>                            | 0.004                          | 0.062                       | 0.031                            | 0.032                  | 10.709                                |
| <b>TnT</b>                            | 0.016                          | 0.033                       | 0.024                            | 0.024                  | 8.265                                 |
| <b>NT-proBNP</b>                      | 0.016                          | 0.008                       | 0.021                            | 0.020                  | 6.598                                 |
| <b>D-dimer</b>                        | 0.005                          | 0.027                       | 0.013                            | 0.014                  | 4.569                                 |
| <b>GDF15</b>                          | 0.010                          | 0.017                       | 0.013                            | 0.013                  | 4.282                                 |
| <b>IGFBP7</b>                         | 0.011                          | 0.004                       | 0.012                            | 0.011                  | 3.707                                 |
| <b>ANGPT2</b>                         | 0.001                          | 0.007                       | 0.009                            | 0.008                  | 2.815                                 |
| <b>FGF23</b>                          | 0.006                          | 0.003                       | 0.005                            | 0.005                  | 1.785                                 |
| <b>FABP3</b>                          | 0.000                          | 0.010                       | 0.004                            | 0.004                  | 1.507                                 |
| <b>ESM1</b>                           | 0.001                          | 0.001                       | 0.003                            | 0.003                  | 0.901                                 |
| <b>CA 125</b>                         | 0.000                          | 0.002                       | 0.001                            | 0.001                  | 0.317                                 |

Supplementary Table 9c: four levels of dominance and resulting percentage relative importance for each biomolecule and poLCA low-intermediate risk cluster.

| <b>Low-intermediate risk cluster</b> |                                |                             |                                  |                        |                                       |
|--------------------------------------|--------------------------------|-----------------------------|----------------------------------|------------------------|---------------------------------------|
|                                      | <b>Interactional Dominance</b> | <b>Individual Dominance</b> | <b>Average Partial Dominance</b> | <b>Total Dominance</b> | <b>Percentage Relative Importance</b> |
| <b>IL-6</b>                          | 0.021                          | 0.082                       | 0.045                            | 0.046                  | 34.305                                |
| <b>CRP</b>                           | 0.020                          | 0.074                       | 0.041                            | 0.042                  | 31.019                                |
| <b>D-dimer</b>                       | 0.006                          | 0.027                       | 0.012                            | 0.012                  | 9.333                                 |
| <b>TnT</b>                           | 0.003                          | 0.020                       | 0.006                            | 0.007                  | 5.368                                 |
| <b>GDF15</b>                         | 0.002                          | 0.021                       | 0.006                            | 0.007                  | 5.285                                 |
| <b>BMP10</b>                         | 0.002                          | 0.001                       | 0.005                            | 0.005                  | 3.428                                 |
| <b>FGF23</b>                         | 0.002                          | 0.011                       | 0.003                            | 0.004                  | 2.914                                 |
| <b>ANGPT2</b>                        | 0.005                          | 0.000                       | 0.004                            | 0.004                  | 2.846                                 |
| <b>FABP3</b>                         | 0.000                          | 0.011                       | 0.002                            | 0.003                  | 1.964                                 |
| <b>NT-proBNP</b>                     | 0.001                          | 0.001                       | 0.002                            | 0.002                  | 1.287                                 |
| <b>CA 125</b>                        | 0.000                          | 0.006                       | 0.001                            | 0.001                  | 1.083                                 |
| <b>IGFBP7</b>                        | 0.000                          | 0.002                       | 0.001                            | 0.001                  | 0.784                                 |
| <b>ESM1</b>                          | 0.000                          | 0.001                       | 0.000                            | 0.001                  | 0.382                                 |

Supplementary Table 9d: four levels of dominance and resulting percentage relative importance for each biomolecule and poLCA low risk cluster.

| <b>Low risk cluster</b> |                                |                             |                                  |                        |                                       |
|-------------------------|--------------------------------|-----------------------------|----------------------------------|------------------------|---------------------------------------|
|                         | <b>Interactional Dominance</b> | <b>Individual Dominance</b> | <b>Average Partial Dominance</b> | <b>Total Dominance</b> | <b>Percentage Relative Importance</b> |
| <b>IGFBP7</b>           | 0.058                          | 0.291                       | 0.112                            | 0.122                  | 17.591                                |
| <b>NT-proBNP</b>        | 0.039                          | 0.256                       | 0.094                            | 0.102                  | 14.759                                |
| <b>ANGPT2</b>           | 0.043                          | 0.223                       | 0.086                            | 0.093                  | 13.486                                |
| <b>GDF15</b>            | 0.028                          | 0.216                       | 0.066                            | 0.074                  | 10.774                                |
| <b>TnT</b>              | 0.028                          | 0.180                       | 0.059                            | 0.066                  | 9.527                                 |
| <b>BMP10</b>            | 0.034                          | 0.158                       | 0.058                            | 0.064                  | 9.292                                 |
| <b>FABP3</b>            | 0.017                          | 0.144                       | 0.042                            | 0.048                  | 6.906                                 |
| <b>FGF23</b>            | 0.018                          | 0.123                       | 0.033                            | 0.039                  | 5.639                                 |
| <b>IL-6</b>             | 0.012                          | 0.121                       | 0.031                            | 0.037                  | 5.326                                 |
| <b>ESM1</b>             | 0.009                          | 0.057                       | 0.016                            | 0.018                  | 2.673                                 |
| <b>CA 125</b>           | 0.004                          | 0.043                       | 0.009                            | 0.011                  | 1.633                                 |
| <b>CRP</b>              | 0.002                          | 0.044                       | 0.009                            | 0.011                  | 1.558                                 |
| <b>D-dimer</b>          | 0.000                          | 0.031                       | 0.004                            | 0.006                  | 0.837                                 |

**Supplementary Figure 5: Receiver Operation Characteristics Curves for different Cox PH models for the *first primary composite outcome*.** All models were fitted against the whole EAST-AFNET 4 (train-) dataset and used to make predictions against the whole EAST-AFNET 4 (train-) dataset. **Plot A** shows model performances / discriminatory powers on EAST-AFNET 4 (train-) dataset as Area under the ROC curve (AUC) at two years. **Plot B** shows model performances / discriminatory powers on BBC-AF (test-) dataset as Area under the ROC curve (AUC) at two years.

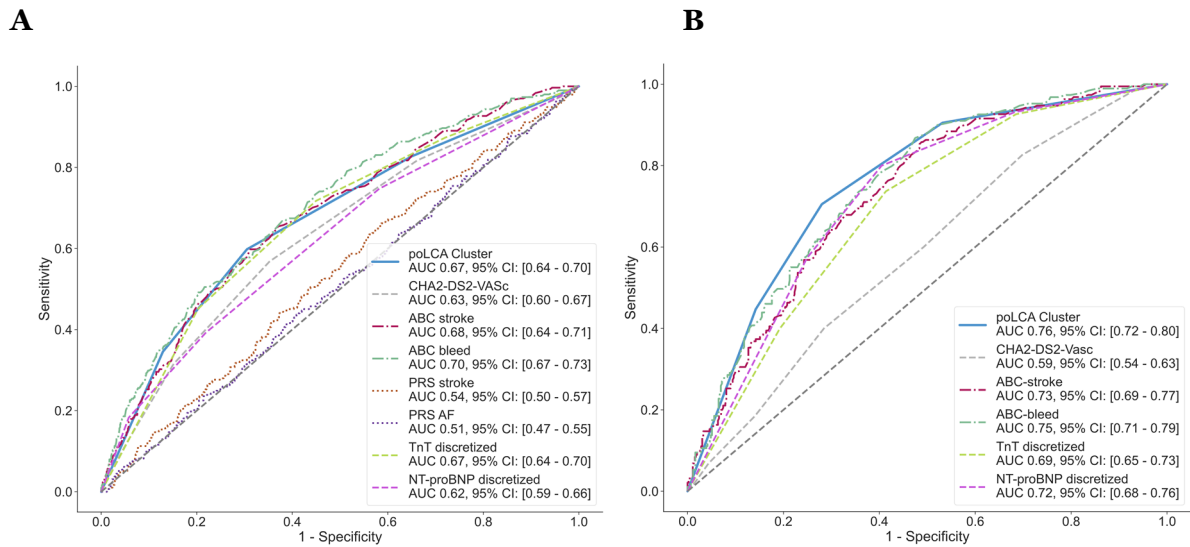

**Supplementary Figure 6: Receiver Operation Characteristics Curves for different Cox PH models for the *safety outcome*.** All models were fitted against the whole EAST-AFNET 4 (train-) dataset and used to make predictions against the whole EAST-AFNET 4 (train-) dataset. **Plot A** shows model performances / discriminatory powers on EAST-AFNET 4 (train-) dataset as Area under the ROC curve (AUC) at two years. **Plot B** shows model performances / discriminatory powers on BBC-AF (test-) dataset as Area under the ROC curve (AUC) at two years.

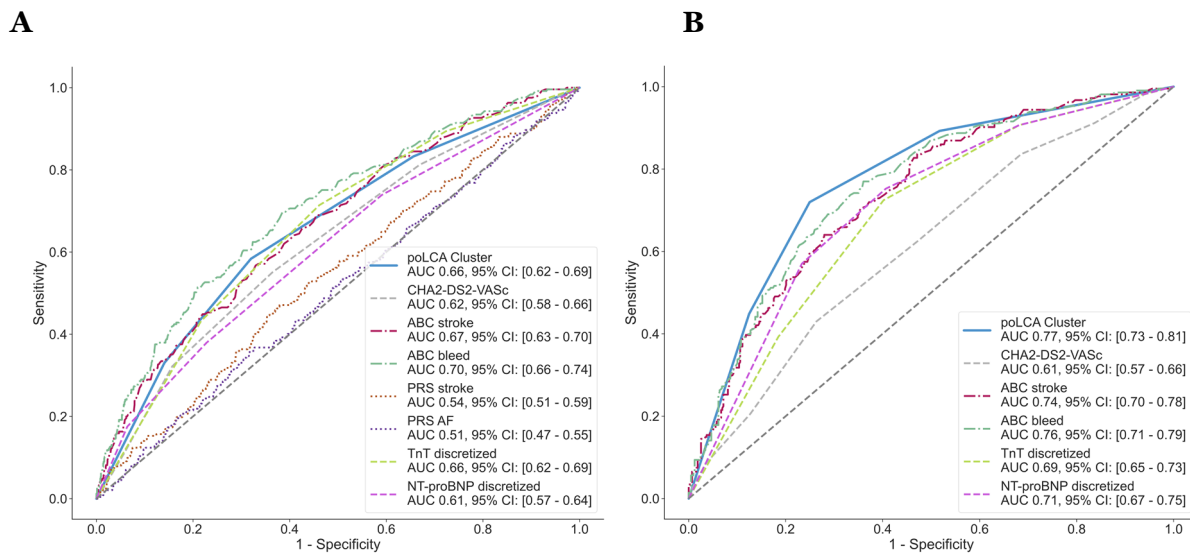

**Supplementary Figure 7: Receiver Operation Characteristics Curves for different Cox PH models *stroke*.** All models were fitted against the whole EAST-AFNET 4 (train-) dataset and used to make predictions against the whole EAST-AFNET 4 (train-) dataset. **Plot A** shows model performances / discriminatory powers on EAST-AFNET 4 (train-) dataset as Area under the ROC curve (AUC) at two years. **Plot B** shows model performances / discriminatory powers on BBC-AF (test-) dataset as Area under the ROC curve (AUC) at two years.

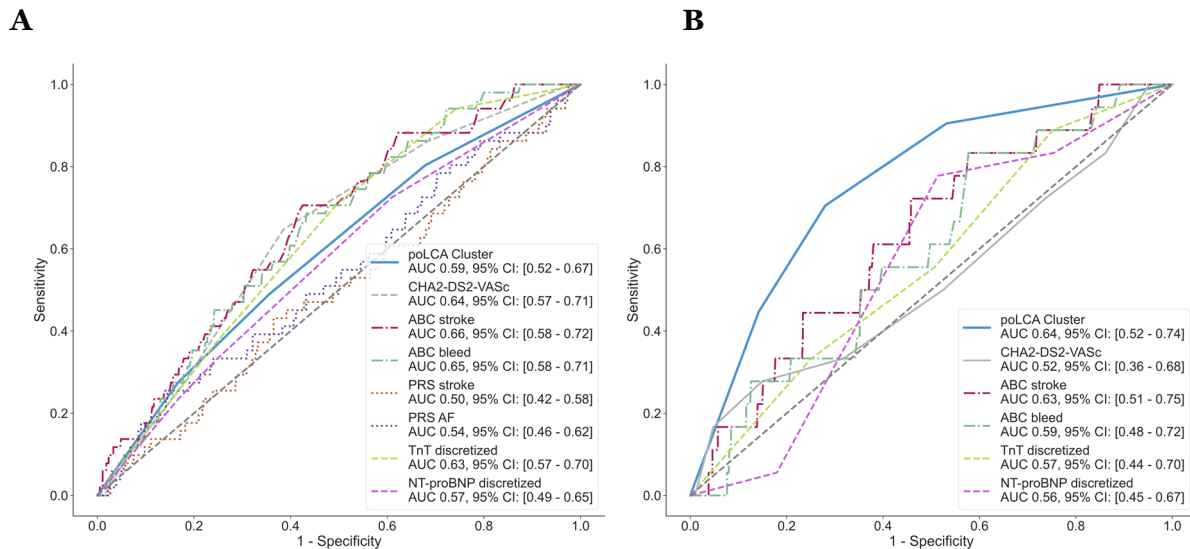

**Supplementary Figure 8: Receiver Operation Characteristics Curves for different Cox PH models *major bleeding event*.** All models were fitted against the whole EAST-AFNET 4 (train-) dataset and used to make predictions against the whole EAST-AFNET 4 (train-) dataset. **Plot A** shows model performances / discriminatory powers on EAST-AFNET 4 (train-) dataset as Area under the ROC curve (AUC) at two years. **Plot B** shows model performances / discriminatory powers on BBC-AF (test-) dataset as Area under the ROC curve (AUC) at two years.

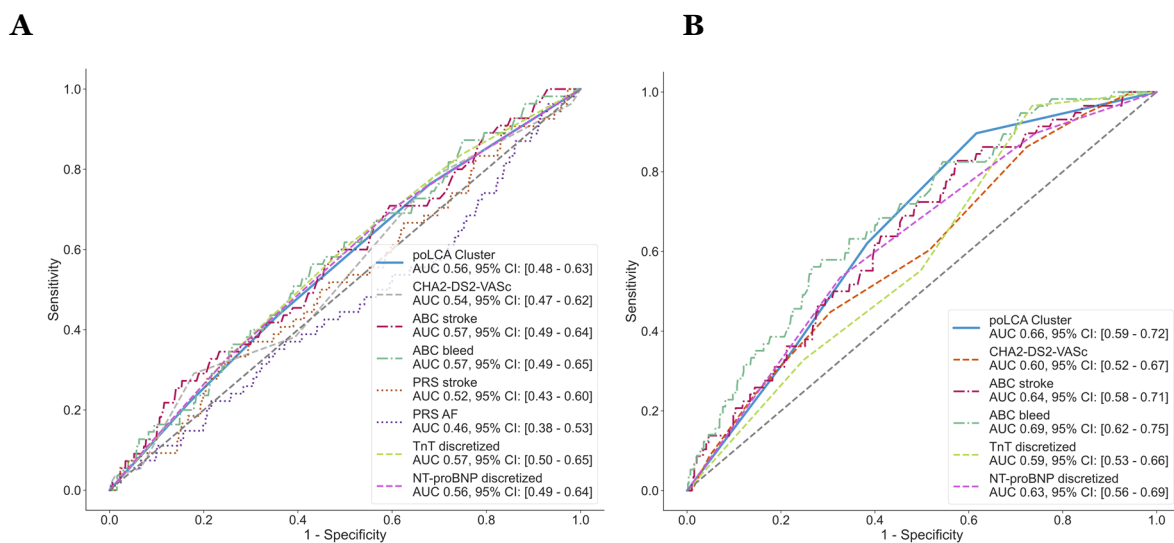

Supplementary Figure 9: Optimal number of cluster groups found by BIC for derivation cohort (EAST-AFNET4) and poLCA model.

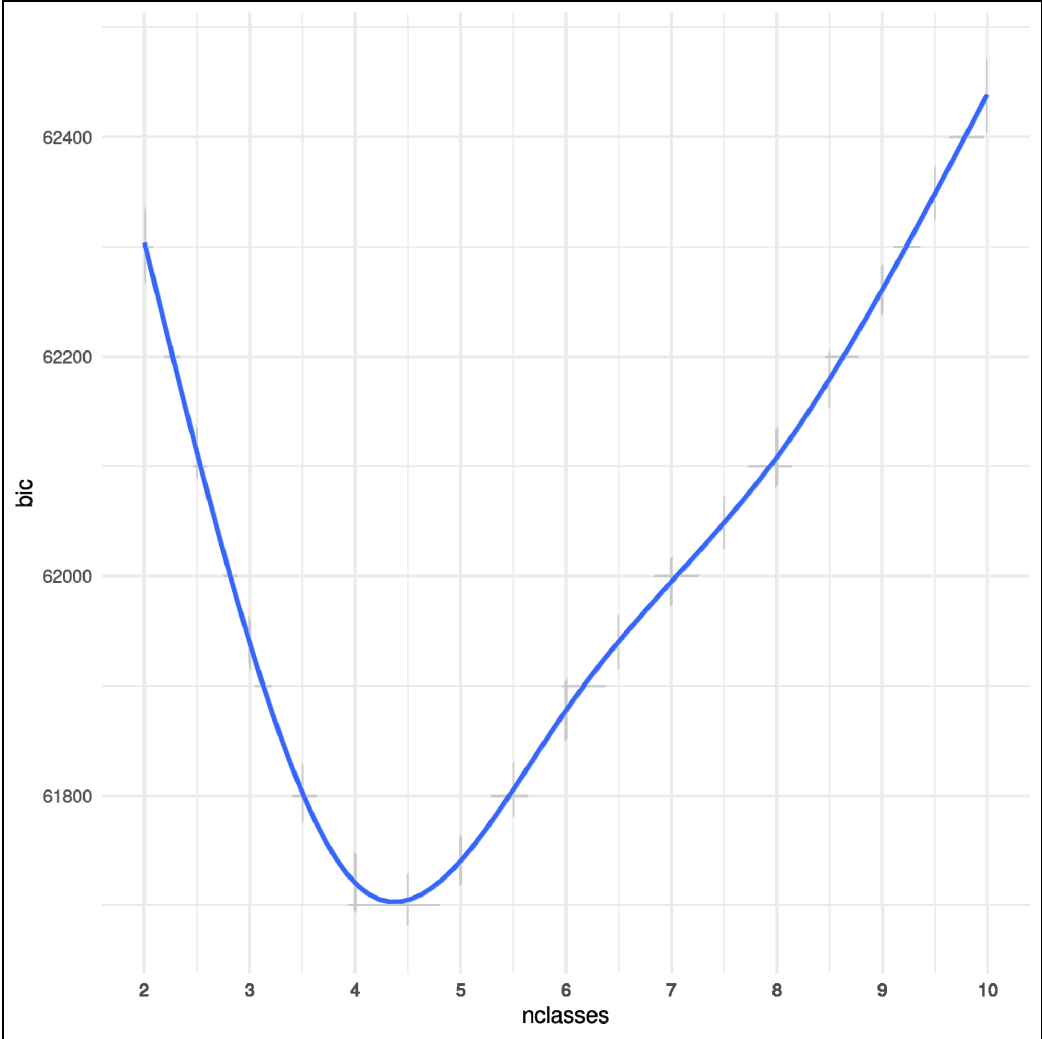

### Reduced biomolecule sets used to find new optimal poLCA clusters

We reduced the full set of biomolecule concentrations (n=13) to less biomolecules (8-12). For each reduced set [n=12 – n=8] we examined all possible biomarker combinations, calculated the optimal number of clusters and compared those found clusters with the original poLCA clusters for n=13 biomarkers by the adjusted rand index. We used the newly found clusters to predict the first primary outcome and report the c-index censored as well as the maximal hazard ratio of the subsequent Cox PH models. As we tested 2379 possible biomarker sets we are only reporting models with c-index above a certain threshold or adjusted rand index below a certain threshold. The idea is that possibly models could exist that do a very different partitioning of patients compared to the original clustering model and may yet yield better discriminatory power for assigning participants in low to high risk sub-groups.

*Supplementary Table 10a: metrics for biomarker combinations with 12 markers. Showing all possible combinations.*

| Number biomarkers | Number of optimal clusters | Adjusted Rand Index | Biomarkers missing | c-index censored | max. hazard ratio |
|-------------------|----------------------------|---------------------|--------------------|------------------|-------------------|
| 12                | 4                          | 0.909               | CA125              | 0.732            | 5.232             |
| 12                | 4                          | 0.855               | ESM1               | 0.730            | 4.875             |
| 12                | 4                          | 0.827               | FGF23              | 0.740            | 5.147             |
| 12                | 4                          | 0.811               | FABP3              | 0.732            | 5.274             |
| 12                | 4                          | 0.799               | TnT                | 0.733            | 5.539             |
| 12                | 4                          | 0.729               | NT-proBNP          | 0.736            | 5.208             |
| 12                | 4                          | 0.711               | ANGPT2             | 0.731            | 5.236             |
| 12                | 4                          | 0.569               | CRP                | 0.726            | 5.264             |
| 12                | 4                          | 0.566               | D-dimer            | 0.727            | 5.217             |
| 12                | 5                          | 0.551               | GDF 15             | 0.730            | 4.910             |
| 12                | 4                          | 0.546               | IL-6               | 0.723            | 5.186             |
| 12                | 4                          | 0.531               | IGFBP7             | 0.736            | 5.382             |
| 12                | 4                          | 0.490               | BMP10              | 0.731            | 5.291             |

*Supplementary Table 10b: metrics for biomarker combinations with 11 markers. Showing 13 out of 78 combinations with c-index >0.75 or <0.45 adjusted Rand Index (descending order).*

| <b>Number biomarkers</b> | <b>Number of optimal clusters</b> | <b>Adjusted Rand Index</b> | <b>Biomarkers missing</b> | <b>c-index censored</b> | <b>max. hazard ratio</b> |
|--------------------------|-----------------------------------|----------------------------|---------------------------|-------------------------|--------------------------|
| 11                       | 4                                 | 0.803                      | CA125, FABP3              | 0.732                   | 5.027                    |
| 11                       | 4                                 | 0.789                      | TnT, CA125                | 0.728                   | 5.200                    |
| 11                       | 4                                 | 0.786                      | D-dimer, FABP3            | 0.730                   | 5.105                    |
| 11                       | 4                                 | 0.772                      | D-dimer, FGF23            | 0.729                   | 4.844                    |
| 11                       | 4                                 | 0.762                      | TnT, D-dimer              | 0.726                   | 4.781                    |
| 11                       | 4                                 | 0.757                      | ESM1, FABP3               | 0.733                   | 5.429                    |
| 11                       | 4                                 | 0.754                      | FABP3, ANGPT2             | 0.733                   | 5.398                    |
| 11                       | 4                                 | 0.445                      | GDF 15, IGFBP7            | 0.721                   | 4.807                    |
| 11                       | 4                                 | 0.439                      | BMP10, FGF23              | 0.729                   | 5.187                    |
| 11                       | 4                                 | 0.434                      | FGF23, IGFBP7             | 0.721                   | 5.120                    |
| 11                       | 3                                 | 0.415                      | NT-proBNP, IGFBP7         | 0.732                   | 5.221                    |
| 11                       | 4                                 | 0.407                      | GDF 15, BMP10             | 0.723                   | 5.284                    |
| 11                       | 4                                 | 0.393                      | BMP10, IGFBP7             | 0.732                   | 5.544                    |

*Supplementary Table 10c: metrics for biomarker combinations with 10 markers. Showing 28 out of 286 combinations with c-index >0.70 or <0.38 adjusted Rand Index (descending order).*

| <b>Number biomarkers</b> | <b>Number of optimal clusters</b> | <b>Adjusted Rand Index</b> | <b>Biomarkers missing</b> | <b>c-index censored</b> | <b>max. hazard ratio</b> |
|--------------------------|-----------------------------------|----------------------------|---------------------------|-------------------------|--------------------------|
| 10                       | 4                                 | 0.754                      | D-dimer, CA125, FABP3     | 0.734                   | 5.053                    |
| 10                       | 4                                 | 0.742                      | CA125, ESM1, FABP3        | 0.737                   | 5.823                    |
| 10                       | 4                                 | 0.738                      | TnT, D-dimer, CA125       | 0.727                   | 4.952                    |
| 10                       | 4                                 | 0.736                      | D-dimer, ESM1, FGF23      | 0.732                   | 4.887                    |
| 10                       | 4                                 | 0.736                      | D-dimer, ESM1, FABP3      | 0.732                   | 5.297                    |
| 10                       | 4                                 | 0.735                      | D-dimer, FABP3, ANGPT2    | 0.739                   | 5.401                    |
| 10                       | 4                                 | 0.730                      | CA125, FABP3, ANGPT2      | 0.732                   | 5.047                    |
| 10                       | 4                                 | 0.727                      | TnT, CA125, ESM1          | 0.731                   | 5.199                    |
| 10                       | 4                                 | 0.721                      | TnT, D-dimer, ESM1        | 0.725                   | 4.969                    |
| 10                       | 4                                 | 0.711                      | TnT, CA125, ANGPT2        | 0.731                   | 4.868                    |
| 10                       | 4                                 | 0.711                      | D-dimer, FABP3, FGF23     | 0.733                   | 4.983                    |
| 10                       | 4                                 | 0.703                      | NT-proBNP, D-dimer, CA125 | 0.729                   | 4.978                    |
| 10                       | 4                                 | 0.701                      | TnT, D-dimer, ANGPT2      | 0.727                   | 4.811                    |
| 10                       | 4                                 | 0.380                      | CA125, BMP10, IGFBP7      | 0.729                   | 5.447                    |
| 10                       | 4                                 | 0.380                      | NT-proBNP, CA125, IGFBP7  | 0.736                   | 5.789                    |
| 10                       | 4                                 | 0.377                      | IL-6, BMP10, IGFBP7       | 0.730                   | 5.660                    |
| 10                       | 3                                 | 0.375                      | NT-proBNP, IGFBP7, ANGPT2 | 0.732                   | 4.466                    |
| 10                       | 4                                 | 0.371                      | BMP10, ESM1, IGFBP7       | 0.740                   | 6.101                    |
| 10                       | 3                                 | 0.370                      | BMP10, IGFBP7, ANGPT2     | 0.732                   | 5.292                    |



| <b>Number biomarkers</b> | <b>Number of optimal clusters</b> | <b>Adjusted Rand Index</b> | <b>Biomarkers missing</b> | <b>c-index censored</b> | <b>max. hazard ratio</b> |
|--------------------------|-----------------------------------|----------------------------|---------------------------|-------------------------|--------------------------|
| 10                       | 5                                 | 0.367                      | GDF 15, ESM1, IGFBP7      | 0.722                   | 5.692                    |
| 10                       | 3                                 | 0.365                      | NT-proBNP, BMP10, IGFBP7  | 0.734                   | 5.055                    |
| 10                       | 5                                 | 0.363                      | CA125, ESM1, IGFBP7       | 0.734                   | 6.841                    |
| 10                       | 4                                 | 0.362                      | GDF 15, BMP10, IGFBP7     | 0.731                   | 5.716                    |
| 10                       | 3                                 | 0.362                      | IL-6, NT-proBNP, IGFBP7   | 0.728                   | 5.084                    |
| 10                       | 4                                 | 0.361                      | FGF23, IGFBP7, ANGPT2     | 0.731                   | 5.088                    |
| 10                       | 4                                 | 0.358                      | NT-proBNP, FABP3, IGFBP7  | 0.719                   | 4.761                    |
| 10                       | 4                                 | 0.352                      | NT-proBNP, ESM1, IGFBP7   | 0.733                   | 5.656                    |
| 10                       | 4                                 | 0.306                      | GDF 15, IGFBP7, ANGPT2    | 0.729                   | 5.488                    |

*Supplementary Table 10d: metrics for biomarker combinations with 9 markers. Showing 21 out of 715 combinations with c-index >0.67 or <0.30 adjusted Rand Index (descending order).*

| <b>Number biomarkers</b> | <b>Number of optimal clusters</b> | <b>Adjusted Rand Index</b> | <b>Biomarkers missing</b>         | <b>c-index censored</b> | <b>max. hazard ratio</b> |
|--------------------------|-----------------------------------|----------------------------|-----------------------------------|-------------------------|--------------------------|
| 9                        | 4                                 | 0.716                      | D-dimer, CA125, FABP3, ANGPT2     | 0.734                   | 5.289                    |
| 9                        | 4                                 | 0.713                      | D-dimer, CA125, ESM1, FABP3       | 0.733                   | 5.453                    |
| 9                        | 4                                 | 0.699                      | D-dimer, CA125, FABP3, FGF23      | 0.733                   | 4.762                    |
| 9                        | 4                                 | 0.691                      | CA125, ESM1, FABP3, FGF23         | 0.738                   | 5.530                    |
| 9                        | 4                                 | 0.686                      | NT-proBNP, D-dimer, CA125, FABP3  | 0.734                   | 5.207                    |
| 9                        | 4                                 | 0.685                      | D-dimer, ESM1, FABP3, FGF23       | 0.738                   | 5.437                    |
| 9                        | 4                                 | 0.684                      | D-dimer, ESM1, FABP3, ANGPT2      | 0.734                   | 5.251                    |
| 9                        | 4                                 | 0.682                      | TnT, D-dimer, CA125, ANGPT2       | 0.729                   | 5.198                    |
| 9                        | 4                                 | 0.675                      | CA125, ESM1, FABP3, ANGPT2        | 0.734                   | 5.451                    |
| 9                        | 4                                 | 0.296                      | NT-proBNP, D-dimer, BMP10, IGFBP7 | 0.729                   | 4.856                    |
| 9                        | 3                                 | 0.294                      | IL-6, NT-proBNP, IGFBP7, ANGPT2   | 0.730                   | 5.515                    |
| 9                        | 4                                 | 0.294                      | NT-proBNP, BMP10, ESM1, IGFBP7    | 0.733                   | 5.463                    |
| 9                        | 3                                 | 0.292                      | IL-6, NT-proBNP, GDF 15, IGFBP7   | 0.718                   | 4.518                    |
| 9                        | 4                                 | 0.291                      | NT-proBNP, FABP3, IGFBP7, ANGPT2  | 0.718                   | 4.789                    |
| 9                        | 4                                 | 0.285                      | BMP10, FABP3, IGFBP7, ANGPT2      | 0.735                   | 5.903                    |
| 9                        | 5                                 | 0.283                      | NT-proBNP, GDF 15, CA125, IGFBP7  | 0.728                   | 6.103                    |
| 9                        | 4                                 | 0.283                      | NT-proBNP, BMP10, FGF23, IGFBP7   | 0.730                   | 5.271                    |

| <b>Number biomarkers</b> | <b>Number of optimal clusters</b> | <b>Adjusted Rand Index</b> | <b>Biomarkers missing</b>         | <b>c-index censored</b> | <b>max. hazard ratio</b> |
|--------------------------|-----------------------------------|----------------------------|-----------------------------------|-------------------------|--------------------------|
| 9                        | 4                                 | 0.283                      | NT-proBNP, GDF 15, IGFBP7, ANGPT2 | 0.731                   | 5.302                    |
| 9                        | 4                                 | 0.277                      | NT-proBNP, TnT, IGFBP7, ANGPT2    | 0.725                   | 3.758                    |
| 9                        | 3                                 | 0.241                      | GDF 15, BMP10, IGFBP7, ANGPT2     | 0.734                   | 3.510                    |
| 9                        | 4                                 | 0.237                      | NT-proBNP, GDF 15, BMP10, IGFBP7  | 0.733                   | 5.659                    |

**Supplementary Table 10e: metrics for biomarker combinations with 8 markers. Showing 28 out of 1287 combinations with c-index >0.60 or <0.25 adjusted Rand Index (descending order).**

| <b>Number biomarkers</b> | <b>Number of optimal clusters</b> | <b>Adjusted Rand Index</b> | <b>Biomarkers missing</b>                 | <b>c-index censored</b> | <b>max. hazard ratio</b> |
|--------------------------|-----------------------------------|----------------------------|-------------------------------------------|-------------------------|--------------------------|
| 8                        | 4                                 | 0.669                      | D-dimer, CA125, ESM1, FABP3, ANGPT2       | 0.731                   | 5.371                    |
| 8                        | 4                                 | 0.664                      | D-dimer, CA125, FABP3, FGF23, ANGPT2      | 0.731                   | 4.835                    |
| 8                        | 4                                 | 0.663                      | D-dimer, CA125, ESM1, FABP3, FGF23        | 0.739                   | 5.627                    |
| 8                        | 4                                 | 0.640                      | TnT, D-dimer, CA125, ESM1, ANGPT2         | 0.726                   | 4.735                    |
| 8                        | 4                                 | 0.636                      | GDF 15, D-dimer, CA125, FABP3, ANGPT2     | 0.731                   | 5.035                    |
| 8                        | 4                                 | 0.630                      | NT-proBNP, D-dimer, CA125, FABP3, FGF23   | 0.735                   | 4.644                    |
| 8                        | 4                                 | 0.630                      | D-dimer, ESM1, FABP3, FGF23, ANGPT2       | 0.731                   | 4.739                    |
| 8                        | 4                                 | 0.623                      | TnT, D-dimer, CA125, ESM1, FABP3          | 0.727                   | 5.017                    |
| 8                        | 4                                 | 0.622                      | NT-proBNP, D-dimer, CA125, ESM1, FABP3    | 0.726                   | 5.238                    |
| 8                        | 4                                 | 0.610                      | GDF 15, D-dimer, ESM1, FABP3, ANGPT2      | 0.723                   | 4.745                    |
| 8                        | 4                                 | 0.608                      | TnT, D-dimer, CA125, FGF23, ANGPT2        | 0.727                   | 4.742                    |
| 8                        | 4                                 | 0.607                      | GDF 15, CA125, ESM1, FABP3, ANGPT2        | 0.724                   | 4.696                    |
| 8                        | 4                                 | 0.603                      | TnT, D-dimer, ESM1, FGF23, ANGPT2         | 0.721                   | 4.489                    |
| 8                        | 4                                 | 0.250                      | NT-proBNP, GDF 15, CA125, BMP10, IGFBP7   | 0.734                   | 5.625                    |
| 8                        | 4                                 | 0.247                      | NT-proBNP, GDF 15, D-dimer, BMP10, IGFBP7 | 0.731                   | 5.312                    |
| 8                        | 4                                 | 0.244                      | NT-proBNP, GDF 15, BMP10, IGFBP7, ANGPT2  | 0.728                   | 4.851                    |
| 8                        | 4                                 | 0.244                      | NT-proBNP, BMP10, FABP3, FGF23, IGFBP7    | 0.722                   | 4.851                    |

| <b>Number biomarkers</b> | <b>Number of optimal clusters</b> | <b>Adjusted Rand Index</b> | <b>Biomarkers missing</b>                | <b>c-index censored</b> | <b>max. hazard ratio</b> |
|--------------------------|-----------------------------------|----------------------------|------------------------------------------|-------------------------|--------------------------|
| 8                        | 4                                 | 0.244                      | NT-proBNP, CA125, FABP3, IGFBP7, ANGPT2  | 0.728                   | 5.265                    |
| 8                        | 3                                 | 0.243                      | NT-proBNP, TnT, D-dimer, BMP10, IGFBP7   | 0.731                   | 6.210                    |
| 8                        | 4                                 | 0.243                      | NT-proBNP, GDF 15, FGF23, IGFBP7, ANGPT2 | 0.721                   | 3.742                    |
| 8                        | 4                                 | 0.239                      | NT-proBNP, BMP10, ESM1, FABP3, IGFBP7    | 0.731                   | 4.980                    |
| 8                        | 4                                 | 0.239                      | NT-proBNP, GDF 15, BMP10, ESM1, IGFBP7   | 0.734                   | 5.413                    |
| 8                        | 4                                 | 0.234                      | NT-proBNP, BMP10, FABP3, IGFBP7, ANGPT2  | 0.725                   | 4.942                    |
| 8                        | 4                                 | 0.230                      | NT-proBNP, GDF 15, BMP10, FGF23, IGFBP7  | 0.727                   | 5.197                    |
| 8                        | 2                                 | 0.220                      | IL-6, NT-proBNP, GDF 15, FABP3, IGFBP7   | 0.720                   | 2.844                    |
| 8                        | 3                                 | 0.189                      | NT-proBNP, TnT, BMP10, FABP3, IGFBP7     | 0.719                   | 5.061                    |
| 8                        | 3                                 | 0.171                      | NT-proBNP, TnT, GDF 15, BMP10, IGFBP7    | 0.715                   | 4.682                    |
| 8                        | 3                                 | 0.170                      | NT-proBNP, GDF 15, BMP10, FABP3, IGFBP7  | 0.718                   | 4.911                    |
